# Supplementary material
Source: PubMed Central journal article supplement (PMC6233850)
Supplement: jamaneurol-75-1187-s001.pdf [file jamaneurol-75-1187-s001.pdf]

2

3

4

5

6

## **PROTOCOL**

7

8

### **The cluster headache inducing abilities of calcitonin gene-related peptide**

10

11

Version 1.2

12

13 Anne Luise Vollesen, MD, PhD student

14 Agneta Henriette Snoer, MD, PhD student

15 Song Guo, MD, PhD

16 Jan Hoffman. MD, PhD

17 Anja Sofie Petersen, medical student, research assistant

18 Rigmor Jensen, DrMSc, prof

19 Messoud Ashina, DrMSc, prof

20

21

22

23

#### **Study investigator and site**

25 Anne Luise Vollesen, MD, PhD student

26 Neurologisk afdeling N, Dansk Hovedpinecenter

27 Glostrup Hospital

28 Nordre Ringvej

29 2600 Glostrup

30 Phone.: 25 73 22 84

31 E-mail: [luisevollesen@gmail.com](mailto:luisevollesen@gmail.com)

32

33 **Table of contents**

34

35 1. Purpose.....3

36 2. Background ..... 3

37 3. Hypotheses .....4

38 4. Design and study day .....5

39 4.1 Design .....5

40 4.2 Measured parameters.....5

41 4.3 Randomization .....5

42 4.4 Participants.....6

43 4.7 Healthy controls .....6

44 4.7.1 Inclusion criteria .....6

45 4.7.2 Exclusion criteria .....6

46 4.7 Study day .....7

47 4.8 Study day 1 & 2 .....7

48 5. Methods.....8

49 5.1 Number of participants.....8

50 5.2 Calculations and statistical methods .....8

51 5.3 Headache registration.....9

52 5.4 Blood samples .....9

53 6. Risk assessment .....9

54 7. Unintended incidents.....10

55 8. Time frame .....11

56 9. Publication .....11

57 10. Economy .....11

58 11. Insurance .....11

59 12. Approvals.....11

60 13. Ethics.....12

61 14. Department responsible for the study .....12

62 15. Ansvarlige læger .....12

63

64

65

66

67

68

**Title:** The cluster headache inducing abilities of calcitonin gene-related peptide

69 **1. Purpose**

70 To investigate possible incidence of headache and cluster headache after administration of  
71 calcitonin-related peptide (CGRP) or placebo.

72

73 *1.1 End points*

74 Primary end points are differences in the occurrence of cluster headache attacks within 60 minutes  
75 after administration of CGRP over 20 minutes (1.5µg/min) versus placebo.

76

77 **2. Background**

78 Cluster headache is a primary headache disorder characterized by short but severe, almost  
79 unbearable pain attacks [1]. The pain is localized retro- and periorbitally and is almost always  
80 unilateral. The disorder is considered to be the most painful form of headache. Consequently, the  
81 disease is a major burden on patients and society, as it results in prolonged periods of illness,  
82 reduced quality of life and high healthcare costs. Thus, there are major social costs for the patient  
83 and their surroundings [2]

84 The headache usually lasts between 15 minutes and three hours and occurs between once every  
85 other day to eight times a day. The pain attacks are accompanied by prominent autonomic  
86 symptoms in the form of tearing, nasal discharge, eye redness, ptosis and motor disorder. These  
87 symptoms are ipsilateral to the pain [3]. The basis for the interconnection between the autonomic  
88 symptoms and the attack pain is still poorly understood. It has been observed that the autonomic  
89 symptoms in some patients may occasionally occur without accompanying pain attacks - and vice  
90 versa. This indicates that the underlying pathways for pain and autonomic symptoms respectively  
91 may be separate - possibly only partially. The threshold for initiation of the pain as well as  
92 autonomic symptoms may also be different. [4]

93 Thus, no explanation unifies the unilateral pains of the cluster headache, which corresponds to the  
94 fifth cranial nerve (n. Trigeminus) propagation, with the ipsilateral autonomic symptoms [4].  
95 Consequently, the treatment options for this patient group are based on empiricism rather than on a  
96 real understanding of the disease mechanisms.

97

98 It is still debatable whether the pain evolves centrally or peripherally. Efferent parasympathetic  
99 fibers from the sphenopalatine ganglion innervate cranial vessels [3-6] and regulate vascular tone  
100 [7,8]. It has been suggested that efferent outflow from parasympathetic nerve fibers with  
101 neuropeptide release may activate perivascular nociceptors during cluster headache attacks [9]. It  
102 has previously been shown that nitroglycerine provokes cluster headache attacks in episodic cluster

103 headache patients (ECH patients) in active cluster, but not in remission phase [10] [11]. A similar  
104 pattern applies to known cluster headache attack “triggers”, such as alcohol. During the active  
105 phase, alcohol intake induces an attack in some patients, unlike in remission phase. A possible  
106 explanation may be that a disturbed interaction between certain areas of the brain causes a  
107 "permissive state" during which attacks may occur. [4]

108 CGRP is a neuropeptide, known from a number of both physiological and pathological processes  
109 and occurs naturally in the body. It has been shown that plasma concentration of CGRP is  
110 significantly increased during cluster headache attacks but not before and after attacks [11]. Attacks  
111 occur approximately 20-40 min after nitroglycerine infusion with vasodilation. During this latency  
112 period before the attack, no increase in plasma concentration of CGRP [10] [11] is seen.

113 Provocation studies with CGRP has been performed in migraine patients in a number of studies at  
114 the Danish Headache Center with no serious side effects noted [12] [14] [15]. CGRP induces  
115 migraine attacks in 65% of migraine patients [12], and CGRP antagonists and monoclonal  
116 antibodies are effective as attack and preventive migraine treatment [13]. A number of drug trials  
117 testing CGRP antagonists in cluster headache patients are underway.

118 It is unknown whether CGRP provokes attacks in patients with cluster headache. In order to  
119 understand the mechanisms of any response, we will take regular blood samples before and during  
120 the study to measure biochemical markers for parasympathetic activation and activation of glial  
121 cells in the trigeminal ganglion (VIP, PACAP, CGRP, NSE and S100B). The current study could  
122 help reveal crucial and unexplained mechanisms behind cluster headache attacks as well as possibly  
123 predict the role of CGRP antagonists in cluster headache treatment. It could shed light on the  
124 possibility of more targeted treatment of this severe pain disorder.

125

### 126 **3. Hypotheses**

127 Based on the above, we set out the following hypotheses:

- 128 • Provocation with CGRP of episodic cluster headache patients in active phase triggers cluster  
129 headache attacks
- 130 • 2. Provocation with CGRP of episodic cluster headache patients in remission phase does not  
131 trigger cluster headache attacks
- 132 • Provocation with CGRP of chronic cluster headache patients triggers cluster headache  
133 attacks more often than in episodic cluster headache patients.

134 **4. Design and study day**

135

136 *4.1 Design*

137 It is a randomized, double-blind, placebo-controlled two-way crossover study. A total of 2x45 study  
138 days are planned with 45 participants. These are divided into three groups as follows:

139

140 **Figure 1**

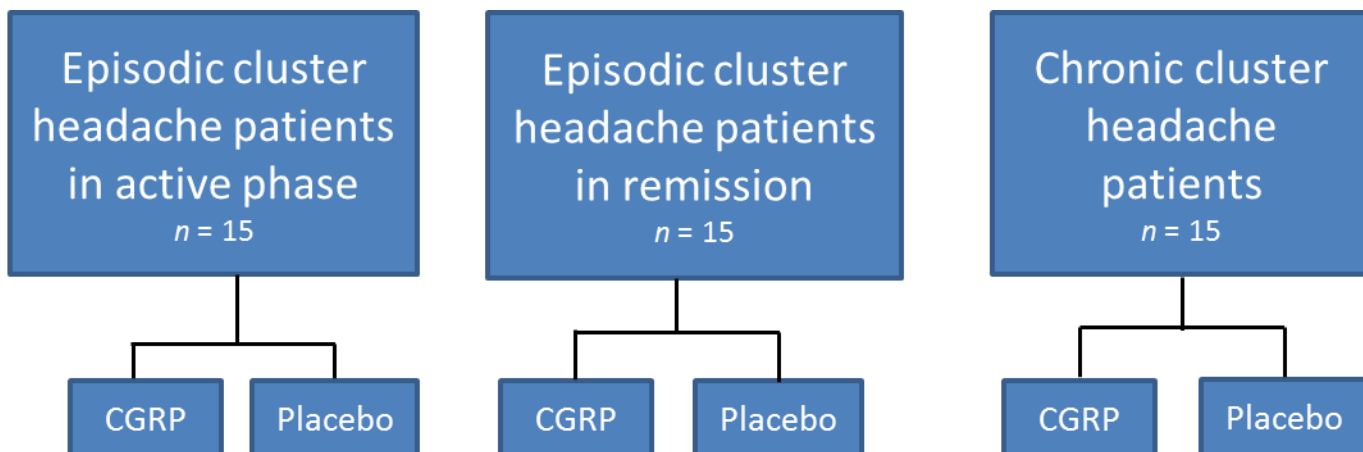

141

142

143 Participants attend study days two times with at least one week intervals. The study is a double-  
144 blind cross-over design with placebo vs. CGRP.

145

146 *4.2 Measured parameters*

147 Headache response: Characteristics of headache, autonomic symptoms, accompanying symptoms  
148 and other side effects are recorded using a schedule every 10 minutes in the first hour (Appendix 4).

149 Pulse and blood pressure are measured prior to intake of the study drug and at the end of the trial (1  
150 hour after). At the end of the trial, the headache response of the trial participant is recorded every

151 hour for the following 24 hours (Appendix 5).

152

153 *4.3 Randomization*

154 Randomization is conducted so that there are approximately as many trial participants who receive  
155 active drug on the first and second study days. The trial leader and other participants in the trial do  
156 not have access to the randomization code. It is stored where the study is carried out in a light-

157 sealed envelope and may be broken in cases where it is deemed necessary for the safety of the

158 participants. There will be an envelope for each subject so that the overall randomization code is not

159 revealed to other subjects in case an envelope is broken.

160 *4.4 Participants*

161 Cluster headache patients diagnosed with episodic and chronic cluster headache according to the  
162 International Classification of Headache Disorders 3rd Beta Edition [16].

163 Trial participants are recruited by telephoning suitable cluster headache patients who are current or  
164 former patients at the Danish Headache Center, who have expressed their interest in participating in  
165 clinical trials. Recruitment is also done via advertisement on the website forsøgsperson.dk and  
166 sundhed.dk (Appendix 7). Drop outs are replaced to ensure sufficient statistical material.

167

168 *4.5 Inclusion criteria*

- 169 • Cluster headache patients fulfilling HIS criteria for episodic and chronic cluster headache,  
170 male and female, aged 18-65, 50-100 kg.
- 171 • Fertile women must use safe contraceptive methods. Fertile women include non-  
172 hysterectomized women or women at least 2 years post-menopausal. Safe contraceptive  
173 methods include IUD, hormonal contraceptive pills or implants, or surgical sterilization.

174

175 *4.6 Exclusion criteria*

- 176 • All other primary headache disorders.
- 177 • Episodic headache patients in remission must be headache free 8 h before study start.
- 178 • Episodic headache patients in active phase or chronic cluster headache patients must be  
179 attack free for 3 h before study start.
- 180 • Pregnant or lactating women.
- 181 • History or signs of hyper- (systolic >150 mmHg and/or diastolic >100 mmHg) or  
182 hypotension (systolic <90 mmHg and/or diastolic <50 mmHg)
- 183 • History or signs of cardiovascular or cerebrovascular disease, or psychiatric disease or drug  
184 misuse.

185 *4.7 Healthy controls*

186 In order to validate the assay, independently of the experiment, blood samples of 15 healthy  
187 subjects are performed. These are recruited by advertising at Glostrup Hospital.

188

189 *4.7.1 Inclusion criteria*

- 190 • Healthy subjects of both sexes between 18-65 years, 50-100 kg

191 *4.7.2 Exclusion criteria*

- 192 • Migraine and cluster headache according to the IHS criteria [1].

- 193           • Headache less than 8 hours before blood sampling

194

195 *4.7 Study day*

196 Prior to the screening visit, the participants will receive an approved participant information and the  
197 "Before You Decide" folder published by DNVK (Authority of the Ministry of Health and  
198 Prevention). The attending physician or a person to whom the responsibility is delegated will  
199 inform the participant thoroughly at the subsequent meeting or telephone call that it is a request for  
200 participation in a scientific study and will provide detailed information about the purpose, course  
201 and possible risks of the trial. By telephoning the participant we will plan a screening visit at  
202 Ringvejsblokken, Glostrup Hospital, at least one day later, and during the phone call we will inform  
203 participants about the right to further reporting time (24 hours) after the oral information and the  
204 possibility to bring an assessor to the visit. Since the participants are already well-informed on the  
205 basis of the telephone conversation, the written participant information and the newly submitted  
206 oral information on the purpose, course and possible risks are obtained by oral and written consent  
207 before the actual medical examination, unless the participants wish for further reporting time. The  
208 screening visit takes place in undisturbed room behind closed doors, the room being marked as  
209 "busy".

210 A medical chart is recorded and a general medical examination is conducted. ECG is measured and  
211 blood pressure is measured. This is done to uncover any underlying risk factors and to ensure that  
212 the participants meet the inclusion criteria and do not meet the exclusion criteria. The participants  
213 will also be informed of the right to withdraw from the study without having to argue for this, and  
214 that this will not affect any future treatment.

215

216

217 *4.8 Study day 1 & 2*

218 Participants meet at 9.30 AM. Women of childbearing potential will submit to a pregnancy test  
219 (urine HCG). After arrival, baseline values of headache intensity are first performed using a 0-10  
220 Verbal Rating Scale (VRS) as well as heart rate and blood pressure. The trial person meets 2 times  
221 (in addition to the screening visit) and receives infusion of CGRP once and placebo the second  
222 time.

223 Before the start of the trial, the subject is placed in a bed, and an intravenous cannula is placed in  
224 the right and left elbow veins used for infusion of CGRP. There will be a medical doctor available  
225 throughout the trial. After 20 minutes rest, baseline values for pulse and blood pressure are noted.  
226 After this, the infusion of CGRP (1.5 µg / min)/placebo is started for 20 minutes. During the test,

227 blood samples are taken 4 times (time 0, 20, 30 and 90min). If the patient develops a cluster  
228 headache attack, further blood tests may be necessary: At start of the attack and 15 minutes and 30  
229 minutes after attack start. Pulse and blood pressure recording and possible headache intensity and  
230 compulsive symptoms are performed every 10 minutes during and up to 90 minutes after the start of  
231 infusion. If the patient develops a cluster headache attack, separate seizure registration will be  
232 performed every 10 minutes. This may mean an extension of the total registration period after the  
233 infusion for a maximum of 120 minutes. The participant lies in bed throughout the experiment.  
234 After the test, the subject will return home if he/she feels ready for it.  
235 The participant is given a questionnaire for registration at home of any headache and other  
236 symptoms in the following 12 hours. If the subject develops a cluster headache attack during the  
237 trial, treatment will be offered in the form of oxygen or attack medicine Sumatriptan injection 6 mg  
238 s.c, Sumatriptan tablet 50 mg or 100 mg or Sumatriptan nasal spray.

239

## 240 **5. Methods**

241

### 242 *5.1 Number of participants*

243 The main objective of the study is to test the difference between the number of patients who  
244 develop headache after taking CGRP or placebo. We determine the risk of a type 1 error of 5% and  
245 want a strength of 80% and thus a risk of type 2 error of 20%. Our hypothesis is that CGRP induces  
246 headache in at least 70% of patients and headache in less than 20% of the placebo group. We have  
247 therefore calculated that 15 people in each group should be included. Calculations are made through  
248 statistics programs on the following website: <http://statpages.org/>

249

### 250 *5.2 Calculations and statistical methods*

251 Primary end points are differences in the occurrence of cluster headache attacks, the area under the  
252 headache curve (AUC headache) (headache intensity x duration) and time to maximum headache  
253 score after CGRP versus placebo. For comparison of: the occurrence of cluster headache attacks  
254 uses McNemar test; AUC headache and maximum headache score between two experimental days  
255 assessed with non-parametric test (Wilcoxon signed rank sum test). Secondary end points are  
256 changes over time in blood pressure and heart rate, and ANOVA is used to test the difference  
257 between two experimental days.



258

### 259 *5.3 Headache registration*

260 Headache is rated verbally on a verbal rating scale (VRS) 0-10. 0 represents no pain, 1 an "altered,  
261 pressing or throbbing but not really painful feeling", 5 moderate headache and 10 the worst possible  
262 headache. Headache response is classified according to IHS criteria [16]. Other effects are recorded  
263 qualitatively using the questionnaire (Appendix 4). Registration: Headache is recorded every 10  
264 minutes in time 0-60 minutes of the investigator. Starting from one hour after hospitalization,  
265 headache data is collected using patient-filled headache questionnaire for the following 12 hours  
266 (see Appendix x). Once filled out, it will be returned in an attached envelope to the Danish  
267 Headache Center. The questionnaire clarifies characteristics of any headache response.

268

### 269 *5.4 Blood samples*

270 During the study blood samples will be taken 4 times (time 0, 20, 30 and 90 min) from intravenous  
271 cannula to measure serum concentrations of VIP, PACAP38, S100B, NSE and CGRP. Four x 30  
272 mL of blood is taken over 90 minutes, ie totaled 120 mL of blood. If the patient develops a cluster  
273 headache attack, it may be necessary to take further blood samples, a maximum of 3 x 30 mL, ie a  
274 total of approximately 210 mL of blood.

275 In order to validate the assay, independently of the experiment, blood samples of 15 healthy  
276 subjects will be taken. In these blood samples, serum concentrations of VIP, PACAP38, S100B,  
277 NSE and CGRP are also measured.

278 Blood samples are stored for approx. 3 months before being submitted for analysis. After analysis,  
279 blood samples are destroyed. Blood samples will be analyzed at the biochemical department  
280 Gentofte Hospital and Glostrup Hospital.

281

## 282 **6. Risk assessment**

283 CGRP infusion: Insertion of intravenous cannula may cause subcutaneous hematoma that  
284 disappears after a few days. Our research group has used the CGRP infusion model for several  
285 years and has not observed any side effects other than redness, palpitations, warmth sensation, and  
286 some developed a transient blood pressure drop and consequently complain of transient dizziness  
287 and nausea (17-19). Blood pressure and the clinical situation stabilized quickly upon interruption of  
288 infusion and placement in Trendelenburg's position.

289 Sumatriptan: Sumatriptan has long been used as a medicine against cluster headaches. Sumatriptan  
290 will be used as rescue medicine in the event of induction of cluster headache and will give the  
291 participants immediate pain relief. The side effects of Sumatriptan injection are considered modest.

292 According to the Pharmaceutical Catalogue, the most common side effects are transient redness,  
293 fatigue and drowsiness.

294 Insertion of intravenous cannula may cause a subcutaneous hematoma that disappears after a few  
295 days and, in very rare cases, infection. There are no known side effects, risks or significant  
296 discomfort associated with pulse and blood pressure recording.

297

298

299

## 300 **7. Unintended events**

301 All unintended events during the trial are recorded and if serious unintended events which are  
302 presumed to be related to the drug occur, the Danish Medicinal Agency will be notified  
303 immediately pursuant to the Medicines Act section 89 (2).

304 In this context, an unintended event is defined as: Any undesired event that is temporarily related to  
305 the administration of the trial medicine, whether or not this accidental event is considered to be  
306 associated with the trial drug. If an unintended event occurs more than 14 days after the last  
307 administration of the trial medicine, and there is no apparent causal link or association with the trial  
308 medicine, this is not considered an unintended event.

309 In this context, a serious accidental incident means any medical case regardless of dose which

- 310 • results in death
- 311 • is life threatening
- 312 • involves hospitalization or extension of existing hospitalization
- 313 • results in persistent or significant disability / incapacity or
- 314 • is a congenital anomaly / malformation

315

316 If the subject develops a cluster headache attack during the study, treatment will be offered in the  
317 form of oxygen or seizure medicine Sumatriptan injection 6 mg s.c, Sumatriptan tablet 50 mg or  
318 100 mg or Sumatriptan nasal spray. Participants are offered attack medication to takehome home in  
319 case of later developed headache. All tests are performed in the presence of a medical doctor with  
320 the possibility of calling for necessary assistance when needed. The department has access to O2,  
321 resuscitation equipment, medicine and infusion fluids for the treatment of acute medical conditions.  
322 This protocol shall be submitted to the Scientific Ethics Committee for the Capital Region and the  
323 Data Inspectorate in accordance with applicable rules.

324

325 **8. Time frame**

326 The experiment is scheduled to take place in summer / autumn 2016.

327

328 **9. Publication**

329 The paper will be sent to a peer reviews international journal. Both positive, negative, and  
330 inconclusive results will be published. The study is expected to result in a scientific paper with the  
331 following authors: Anne Luise Vollesen, Song Guo, Jan Hoffman, Anja Sofie Petersen, Rigmor  
332 Jensen and Messoud Ashina.

333

334 **10. Economy**

335 Disability allowance for subjects is DKK 200 per person per hour and totals approximately 7 x 200  
336 kr. = 1400 kr. per subject (taxable). The trial does not receive support from pharmaceutical  
337 companies. The costs of the trial are covered by the Headache Research Fund, Glostrup Hospital,  
338 which includes funds under public audit. There will be ongoing research funding for the project  
339 from research funds, but implementation of the project is not dependent on obtaining such support.  
340 If such support is obtained, the committee will be informed and the participant information updated.  
341 The researcher, Song Guo, PhD student, is employed by the Danish Headache Center. Initiator is  
342 the Danish Headache Center with Song Guo as contact person.

343

344 **11. Insurance**

345 If during the trial or as a result of it any injury or complications for the trial participants occurs, they  
346 are covered by Glostrup Hospital Patient Insurance.

347

348 **12. Approvals**

349 The protocol shall be submitted to the Scientific Ethics Committee for the Capital Region and the  
350 Data Inspectorate. Our research group has previously done CGRP trials with the same dose in  
351 migraine patients, where it was used as a tool [15] [14]. It is therefore also considered as a tool in  
352 this experiment. Therefore, it is not considered to be subject to the notification obligation to the  
353 Danish Medicines Agency, and thus this is not done (Act on Medicinal Products Section 24, see the  
354 Danish Medicines Agency's guidance on the notification of clinical trials of medicinal products on  
355 humans). The study is also reported to the Data Inspectorate in accordance with applicable rules.

356

357 **13. Ethics**

358 The study will be conducted according to the Helsinki Declaration of 1984, modified at the 41st  
359 World Congress in Hong Kong in 1989. The study must be approved by the Local Science Ethics  
360 Committee. Attendees will only be included after full written and oral information and written  
361 acceptance. The study participants may withdraw from the trial at any time without justification and  
362 without it affecting future treatment. Based on our previous experience with CGRP, the side effects  
363 are mild and transient. Should unwanted events such as allergic reactions occur contrary to our  
364 expectations, there is a relevant action plan for observation and treatment of the participant. The  
365 study will help to clarify where cluster headache pain initiates. This is of great interest in future  
366 research, as such knowledge is an important prerequisite for the development of better cluster  
367 headache medicine with fewer systemic side effects in the short and long term. It is our opinion that  
368 the disadvantages, discomfort and risk of trial participants are proportional to the significance of the  
369 expected results. Processing of personal data will be complied with in accordance with the law and  
370 data protection rules. All data collected will be treated confidentially and only published in  
371 anonymized form. Council data and randomization codes are stored under safe conditions for 15  
372 years after the end of the trial in anonymized form. If information from patient records is required,  
373 consent is obtained from the patient in accordance with section 43 (3) of the Health Act. 1. The  
374 information will be used to screen the patient for the inclusion and exclusion criteria for the  
375 experiment.

376

377 **14. Department responsible for the study**

378 Neurological dept. N, Danish Headache Center, Glostrup Hospital, Ndr. Ringvej 57, 2600 Glostrup

379

380 **15. Study investigators**

381 Anne Luise Vollesen, MD, PhD student

382 Song Guo, MD, PhD

383 Rigmor Jensen, DrMSc, prof

384 Messoud Ashina, DrMSc, prof

385

386 The study is performed and participant information is provided by medical doctor Song Guo, or by  
387 specially trained staff under the supervision of the study medical doctors.

388

- 389 1. The International Classification of Headache Disorders, 3rd edition (beta version).  
390 Cephalalgia. 2013 Jul;33(9):629–808.
- 391 2. Jensen RM, Lyngberg a., Jensen RH. Burden of cluster headache. Cephalalgia.  
392 2007;27(6):535–41.
- 393 3. Ekbom K, Hardebo JE. Aetiology , Diagnosis and Management. 2002;62(1):61–9.
- 394 4. Leone M, Bussone G. Pathophysiology of trigeminal autonomic cephalalgias. Lancet Neurol.  
395 Elsevier Ltd; 2009;8(8):755–64.
- 396 5. Hara H, Zhang QJ, Kuroyanagi T, Kobayashi S. Parasympathetic cerebrovascular  
397 innervation: an anterograde tracing from the sphenopalatine ganglion in the rat.  
398 Neurosurgery. 1993 May;32(5):822–7; discussion 827.
- 399 6. Uddman R, Edvinsson L, Hara H. Axonal tracing of autonomic nerve fibers to the superficial  
400 temporal artery in the rat. Cell Tissue Res. 1989 Jun;256(3):559–65.
- 401 7. Edvinsson L, Hara H, Uddman R. Retrograde tracing of nerve fibers to the rat middle  
402 cerebral artery with true blue: colocalization with different peptides. J Cereb Blood Flow  
403 Metab. 1989 Apr;9(2):212–8.
- 404 8. Uddman R, Hara H, Edvinsson L. Neuronal pathways to the rat middle meningeal artery  
405 revealed by retrograde tracing and immunocytochemistry. J Auton Nerv Syst. 1989  
406 Feb;26(1):69–75.
- 407 9. Hara H, Jansen I, Ekman R, Hamel E, MacKenzie ET, Uddman R, et al. Acetylcholine and  
408 vasoactive intestinal peptide in cerebral blood vessels: effect of extirpation of the  
409 sphenopalatine ganglion. J Cereb Blood Flow Metab. 1989 Apr;9(2):204–11.
- 410 10. Seylaz J, Hara H, Pinard E, Mraovitch S, MacKenzie ET, Edvinsson L. Effect of stimulation  
411 of the sphenopalatine ganglion on cortical blood flow in the rat. J Cereb Blood Flow Metab.  
412 1988 Dec;8(6):875–8.
- 413 11. Burstein R, Jakubowski M. Unitary hypothesis for multiple triggers of the pain and strain of  
414 migraine. J Comp Neurol. 2005 Dec;493(1):9–14.
- 415 12. Ekbom K. Nitroglycerine as a Provocative Agent in Cluster Headache. 1968.
- 416 13. Fanciullacci M, Alessandri M, Sicuteri R, Marabini S. Responsiveness of the  
417 trigeminovascular system to nitroglycerine in cluster headache patients. Brain.  
418 1997;120:283–8.
- 419 14. Lassen L, Haderslev P, Jacobsen V, Iversen H, Sperling B, Olesen J. CGRP may play a  
420 causative role in migraine. Cephalalgia. 2002 Feb;22(1):54–61.
- 421 15. Kaiser E a., Russo AF. CGRP and migraine: Could PACAP play a role too? Neuropeptides.  
422 Elsevier Ltd; 2013;47(6):451–61.
- 423 16. Hansen JM, Hauge AW, Olesen J, Ashina M. Calcitonin gene-related peptide triggers  
424 migraine-like attacks in patients with migraine with aura. Cephalalgia. 2010;30(10):1179–86.

- 425 17. Hansen JM, Thomsen LL, Olesen J, Ashina M. Calcitonin gene-related peptide does not  
426 cause migraine attacks in patients with familial hemiplegic migraine. *Headache*.  
427 2011;51(4):544–53.
- 428 18. The International Classification of Headache Disorders: 2nd edition. *Cephalalgia*. 2004  
429 Jan;24 Suppl 1:9–160.
- 430
- 431

1 **Amendment #1**

2 **06.12.16**

3 1) Postponement of the deadline for completion of the trial until 01.01.2018.

4 2) Change of study investigator from Dr. Song Guo to Dr. Anne Luise Vollesen

5

6 1) The completion of the experiments is taking longer than initially assumed.

7 2) Dr. Song Guo wishes to transfer the investigator responsibility to Dr. Anne Luise Vollesen, as she will be fully  
8 responsible for the trial from now on.

9

10 **Amendment #2**

11 **02.05.17**

12

13 The following exclusion criteria regarding all subjects will be changed from

14

15 • Must be headache free for at least 8 hours before trial start

16

17 to

18

19 • Episodic cluster headache patients in remission must be headache free for at least 8 hours before trial start

20 • Episodic cluster headache patients in cluster and chronic cluster headache patients should be attack free for  
21 3 hours

22

23 Since episodic cluster headache patients in cluster and chronic cluster headache patients can have up to 8  
24 attacks daily, there is no reason to suspect that they need to have been attack free for longer than 3 hours  
25 before an attack can be provoked. Therefore, the time interval is changed for this group of patients with  
26 disease activity, whereas the time interval is maintained for episodic cluster headache patients in remission.  
27 The change will increase the feasibility of the experiment.

28

29
